# Supplementary material for: Sibling chimerism among microglia in marmosets
Source: PubMed Central journal article supplement — bioRxiv. 2023 Oct 17:2023.10.16.562516. Preprint. [Version 1] doi: 10.1101/2023.10.16.562516 (PMC10614798; doi:10.1101/2023.10.16.562516), 2023-10-17
Supplement: NIHPP2023.10.16.562516v1-supplement-1.pdf [file NIHPP2023.10.16.562516v1-supplement-1.pdf]

712 **Supplementary Table 1.** Marmosets analyzed with snRNA-seq in this study. Colonies: NEPRC  
 713 - New England Primate Research Colony; CLEA - Central Institute for Experimental Animals,  
 714 Japan; Company A: marmosets obtained from a non-clinical contract research organization.

| ID    | Tissue | Sex | Age         | No. birth siblings (sex of sibling(s)) | Colony   | Single-cell platform |
|-------|--------|-----|-------------|----------------------------------------|----------|----------------------|
| CJ001 | Brain  | F   | Neonate     | 2 (M, M)                               | NEPRC    | Drop-seq             |
| CJ006 | Brain  | M   | Neonate     | 2 (F, unknown)                         | CLEA     | 10X                  |
| CJ007 | Brain  | F   | Neonate     | 2 (M, unknown)                         | CLEA     | 10X                  |
| CJ022 | Brain  | F   | 2 yrs 8 mos | 1 (M)                                  | NEPRC    | Drop-seq, 10X        |
| CJ023 | Brain  | F   | 2 yrs       | 2 (F, M)                               | NEPRC    | Drop-seq             |
| CJ025 | Brain  | M   | 2 yrs       | 1 (M)                                  | NEPRC    | Drop-seq             |
| CJ026 | Brain  | M   | 2 yrs 8 mos | 1 (F)                                  | NEPRC    | Drop-seq             |
| CJ026 | Blood  |     |             |                                        |          | 10X                  |
| CJ026 | Liver  |     |             |                                        |          | 10X                  |
| CJ026 | Kidney |     |             |                                        |          | 10X                  |
| CJ027 | Brain  | M   | 2 years     | 1 (M)                                  | CompanyA | 10X                  |
| CJ027 | Blood  |     |             |                                        |          | 10X                  |
| CJ028 | Brain  | F   | 2 years     | 2 (M, F)                               | NEPRC    | 10X                  |
| CJ028 | Blood  |     |             |                                        |          | 10X                  |
| CJ029 | Brain  | M   | 2 years     | 1 (M)                                  | CLEA     | 10X                  |
| CJ102 | Brain  | F   | 6 mos       | 1 (M)                                  | CompanyA | Drop-seq, 10X        |

715  
 716

717 **Supplementary Table 2.** Number of microglia and macrophage cells identified in brain datasets  
 718 and number of nuclei profiled in blood, liver and kidney.

| ID    | Tissue | Microglia | Macrophage | Other Cell Types | Total nuclei | Percent Microglia | Percent Macrophage |
|-------|--------|-----------|------------|------------------|--------------|-------------------|--------------------|
| CJ001 | Brain  | 1,063     | 16         | 89,599           | 90,678       | 1.17%             | 0.02%              |
| CJ006 | Brain  | 632       | 259        | 165,272          | 166,163      | 0.38%             | 0.16%              |
| CJ007 | Brain  | 1,155     | 139        | 105,407          | 106,701      | 1.08%             | 0.13%              |
| CJ022 | Brain  | 3,659     | 228        | 217,312          | 221,199      | 1.65%             | 0.10%              |
| CJ023 | Brain  | 581       | 38         | 79692            | 80,311       | 0.72%             | 0.05%              |
| CJ025 | Brain  | 1,366     | 131        | 210628           | 212,125      | 0.64%             | 0.06%              |
| CJ026 | Brain  | 693       | 26         | 62743            | 63,462       | 1.09%             | 0.04%              |
| CJ027 | Brain  | 8,398     | 167        | 342,419          | 350,984      | 2.39%             | 0.05%              |
| CJ028 | Brain  | 18,185    | 172        | 478,765          | 497,333      | 3.66%             | 0.03%              |
| CJ029 | Brain  | 11,874    | 285        | 320,000          | 332,159      | 3.57%             | 0.09%              |
| CJ102 | Brain  | 1,124     | 43         | 56,602           | 57,769       | 1.95%             | 0.07%              |
|       |        |           |            |                  |              |                   |                    |
| CJ026 | Blood  | NA        | NA         | 1,741            | 1,741        | NA                | NA                 |
| CJ026 | Liver  | NA        | NA         | 10,877           | 10,877       | NA                | NA                 |
| CJ026 | Kidney | NA        | NA         | 9,262            | 9,262        | NA                | NA                 |
| CJ027 | Blood  | NA        | NA         | 2,529            | 2,529        | NA                | NA                 |
| CJ028 | Blood  | NA        | NA         | 10,042           | 10,042       | NA                | NA                 |

719  
 720  
 721  
 722

723 **Supplementary Table 3.** Comparison of chimerism between CJ028's two birth siblings, in blood  
 724 and in brain myeloid cells (microglia and macrophage). *P*-values are from a two-sided test of  
 725 proportions between chimerism fractions of sibling 1 and sibling 2 using the prop.test function in  
 726 R.

| Cell type                | Total nuclei | Sibling 1 nuclei | Sibling 2 nuclei | Sibling 1 Fraction | Sibling 2 Fraction | Sibling 1 + Sibling 2 Fraction | <i>P</i> -value        |
|--------------------------|--------------|------------------|------------------|--------------------|--------------------|--------------------------------|------------------------|
| microglia and macrophage | 19701        | 6922             | 2689             | 0.35               | 0.14               | 0.49                           | <2.2x10 <sup>-16</sup> |
| microglia only           | 19447        | 6873             | 2621             | 0.35               | 0.13               | 0.49                           | <2.2x10 <sup>-16</sup> |
| macrophage only          | 254          | 49               | 68               | 0.20               | 0.27               | 0.46                           | 5.8x10 <sup>-2</sup>   |
| blood                    | 10042        | 1758             | 6739             | 0.18               | 0.67               | 0.85                           | <2.2x10 <sup>-16</sup> |

727  
 728  
 729  
 730  
 731  
 732  
 733  
 734  
 735

**Supplementary Table 4.** Summary of context versus genetic effects analysis, with two brain regions of an animal as two contexts. The analysis described in Fig. 5D-F was repeated across all animals and brain regions with at least 60 cells that are available for analysis in each context, and the summary of the correlations are tabulated here. The correlations are plotted in Supplementary Fig. 5. Abbreviations; STR: striatum; Thal: thalamus; Hippo: hippocampus; Hyp: hypothalamus; BF: basal forebrain.

| Host ID | Sibling ID | Brain Region1 | Brain Region2 | Genetic Effects Spearman Correlation | Context Effects Spearman Correlation |
|---------|------------|---------------|---------------|--------------------------------------|--------------------------------------|
| CJ022   | CJ106      | Cortex        | Thal          | 0.1                                  | 0.73                                 |
| CJ025   | CJ104      | Cortex        | STR           | 0.03                                 | 0.2                                  |
| CJ027   | CJ140      | Cortex        | Thal          | 0.13                                 | 0.64                                 |
| CJ027   | CJ140      | Cortex        | STR           | 0.14                                 | 0.69                                 |
| CJ027   | CJ140      | Cortex        | Hippo         | 0.08                                 | 0.46                                 |
| CJ027   | CJ140      | Cortex        | Hyp           | 0.03                                 | 0.68                                 |
| CJ027   | CJ140      | Thal          | Hippo         | 0.04                                 | 0.56                                 |
| CJ027   | CJ140      | Thal          | Hyp           | 0.09                                 | 0.66                                 |
| CJ027   | CJ140      | STR           | Hippo         | 0.08                                 | 0.43                                 |
| CJ027   | CJ140      | STR           | Hyp           | 0.08                                 | 0.59                                 |
| CJ027   | CJ140      | Hippo         | Hyp           | 0.04                                 | 0.51                                 |
| CJ028   | CJ141      | Cortex        | Thal          | 0.1                                  | 0.66                                 |
| CJ028   | CJ142      | Cortex        | Thal          | 0.03                                 | 0.55                                 |
| CJ141   | CJ142      | Cortex        | Thal          | 0.07                                 | 0.59                                 |
| CJ028   | CJ141      | Cortex        | STR           | 0.13                                 | 0.68                                 |
| CJ028   | CJ142      | Cortex        | STR           | 0.1                                  | 0.58                                 |
| CJ141   | CJ142      | Cortex        | STR           | 0.09                                 | 0.61                                 |
| CJ028   | CJ141      | Cortex        | Hippo         | 0.06                                 | 0.39                                 |

|       |       |        |          |      |      |
|-------|-------|--------|----------|------|------|
| CJ028 | CJ142 | Cortex | Hippo    | 0    | 0.33 |
| CJ141 | CJ142 | Cortex | Hippo    | 0.04 | 0.38 |
| CJ028 | CJ141 | Cortex | BF       | 0.13 | 0.73 |
| CJ028 | CJ142 | Cortex | BF       | 0.07 | 0.6  |
| CJ141 | CJ142 | Cortex | BF       | 0.09 | 0.6  |
| CJ028 | CJ141 | Cortex | Hyp      | 0.06 | 0.78 |
| CJ028 | CJ142 | Cortex | Hyp      | 0.07 | 0.72 |
| CJ141 | CJ142 | Cortex | Hyp      | 0.08 | 0.75 |
| CJ028 | CJ141 | Cortex | Amygdala | 0.14 | 0.65 |
| CJ028 | CJ142 | Cortex | Amygdala | 0.1  | 0.53 |
| CJ141 | CJ142 | Cortex | Amygdala | 0.12 | 0.57 |
| CJ028 | CJ141 | STR    | Hippo    | 0.06 | 0.63 |
| CJ028 | CJ142 | STR    | Hippo    | 0.01 | 0.56 |
| CJ141 | CJ142 | STR    | Hippo    | 0.03 | 0.61 |
| CJ028 | CJ141 | STR    | BF       | 0.14 | 0.63 |
| CJ028 | CJ142 | STR    | BF       | 0.06 | 0.5  |
| CJ141 | CJ142 | STR    | BF       | 0.05 | 0.52 |
| CJ028 | CJ141 | Hyp    | Amygdala | 0.14 | 0.68 |
| CJ028 | CJ142 | Hyp    | Amygdala | 0.21 | 0.65 |
| CJ141 | CJ142 | Hyp    | Amygdala | 0.07 | 0.68 |
| CJ029 | CJ143 | Cortex | Thal     | 0.09 | 0.61 |
| CJ029 | CJ143 | Cortex | STR      | 0.06 | 0.5  |
| CJ029 | CJ143 | Cortex | Hippo    | 0.05 | 0.62 |
| CJ029 | CJ143 | Cortex | BF       | 0.09 | 0.79 |
| CJ029 | CJ143 | Cortex | Hyp      | 0.07 | 0.78 |
| CJ029 | CJ143 | Cortex | Amygdala | 0.07 | 0.32 |
| CJ029 | CJ143 | Thal   | STR      | 0.09 | 0.48 |
| CJ029 | CJ143 | Thal   | Hippo    | 0.06 | 0.71 |
| CJ029 | CJ143 | Thal   | BF       | 0.14 | 0.75 |
| CJ029 | CJ143 | Thal   | Hyp      | 0.13 | 0.8  |
| CJ029 | CJ143 | Thal   | Amygdala | 0.05 | 0.52 |
| CJ029 | CJ143 | Hippo  | BF       | 0.06 | 0.77 |
| CJ029 | CJ143 | Hippo  | Hyp      | 0.03 | 0.78 |
| CJ102 | CJ103 | Cortex | STR      | 0.07 | 0.32 |

736  
737  
738  
739

740 **Supplementary Table 5.** Clustering parameters used to identify microglia and macrophage cell  
 741 types, and thresholds for identifying host-sibling doublets. The final number of microglia and  
 742 macrophages after the second round of clustering are in Supplementary Table 2. A cell is  
 743 assigned as a doublet if the Dropulation tool `DetectDoublets` assigned the highest likelihood  
 744 for the cell as a doublet and if the log10 of the best likelihood minus the log10 of the second-  
 745 best likelihood (`lrt_test_stat`) is greater than the doublet detection threshold (last column).

| Marmoset ID | Tissue          | Resolution parameter | Nearest neighbor parameter | UMI threshold (min log-UMI per cell) | Doublet Detection Threshold ( <code>lrt_test_stat</code> ) |
|-------------|-----------------|----------------------|----------------------------|--------------------------------------|------------------------------------------------------------|
| CJ001       | Brain           | 0.8                  | 10                         | 1.2                                  | 0.0                                                        |
| CJ006       | Brain           | 0.5                  | 10                         | 1.2                                  | 5.0                                                        |
| CJ007       | Brain           | 0.5                  | 20                         | 1.2                                  | 10.0                                                       |
| CJ022       | Brain Drop-seq  | 0.5                  | 20                         | 1.2                                  | 2.0                                                        |
| CJ022       | Brain 10X       | 0.5                  | 20                         | 1.5                                  | 2.0                                                        |
| CJ023       | Brain           | 0.5                  | 20                         | 1.2                                  | 3.0                                                        |
| CJ025       | Brain           | 0.5                  | 20                         | 1.0                                  | 0.5                                                        |
| CJ026       | Brain           | 0.5                  | 20                         | 1.0                                  | 2.0                                                        |
| CJ026       | Blood           | 0.5                  | 20                         | 1.4                                  | 4.0                                                        |
| CJ026       | Liver           | 0.5                  | 20                         | 1.9                                  | 8.0                                                        |
| CJ026       | Kidney          | 0.5                  | 20                         | 1.9                                  | 8.0                                                        |
| CJ027       | Brain Cortex A  | 0.5                  | 20                         | 1.5                                  | 20.0                                                       |
| CJ027       | Brain Cortex B  | 0.5                  | 20                         | 1.5                                  | 20.0                                                       |
| CJ027       | Brain others    | 0.5                  | 20                         | 1.5                                  | 20.0                                                       |
| CJ027       | Blood           | 0.5                  | 20                         | 1.5                                  | 1.0                                                        |
| CJ028       | Brain Cortex A  | 0.5                  | 20                         | 1.5                                  | 25.0                                                       |
| CJ028       | Brain Cortex B  | 0.8                  | 10                         | 1.5                                  | 25.0                                                       |
| CJ028       | Brain others    | 0.5                  | 20                         | 1.5                                  | 25.0                                                       |
| CJ028       | Blood           | 0.5                  | 20                         | 1.5                                  | 1.0                                                        |
| CJ029       | Brain Cortex    | 0.5                  | 20                         | 1.5                                  | 20.0                                                       |
| CJ029       | Brain others    | 0.5                  | 20                         | 1.5                                  | 20.0                                                       |
| CJ102       | Brain, Drop-seq | 0.8                  | 10                         | 1.2                                  | 3.0                                                        |
| CJ102       | Brain, 10X      | 0.5                  | 20                         | 1.2                                  | 5.0                                                        |

746  
 747  
 748

749 **Supplementary Table 6.** Whole genome sequencing datasets used in (1) donor-of-origin  
 750 assignment from snRNA-seq (Dropulation), and (2) estimating chimerism from blood whole  
 751 genome sequencing (Census-seq).

| ID                       | Tissue/DNA source  | Sequencing coverage |
|--------------------------|--------------------|---------------------|
| CJ001                    | Fibroblast culture | 36.4X               |
| CJ119 (CJ001's sibling1) | Fibroblast culture | 39.7X               |
| CJ120 (CJ001's sibling2) | Fibroblast culture | 36.7X               |
| CJ006 (CJ007's sibling)  | Fibroblast culture | 45.9X               |
| CJ007 (CJ006's sibling)  | Fibroblast culture | 55.8X               |
| CJ022                    | Fibroblast culture | 38.4X               |
| CJ106 (CJ022's sibling)  | Buccal swab        | 36.0X               |
| CJ023                    | Fibroblast culture | 34.9X               |
| CJ131 (CJ023's sibling1) | Fibroblast culture | 39.5X               |
| CJ116 (CJ023's sibling2) | Fibroblast culture | 28.3X               |
| CJ025                    | Fibroblast culture | 72.7X               |
| CJ104 (CJ025's sibling)  | Buccal swab        | 58.0X               |
| CJ026                    | Fibroblast culture | 74.1X               |
| CJ105 (CJ026's sibling)  | Buccal swab        | 43.7X               |
| CJ027                    | Fibroblast culture | 47.5X               |
| CJ027                    | Blood              | 46.9X               |
| CJ140 (CJ027's sibling)  | Fibroblast culture | 40.2X               |
| CJ028                    | Fibroblast culture | 44.6X               |
| CJ028                    | Blood              | 52.6X               |
| CJ141 (CJ028's sibling1) | Fibroblast culture | 43.6X               |
| CJ142 (CJ028's sibling2) | Fibroblast culture | 41.2X               |
| CJ029                    | Fibroblast culture | 49.2X               |
| CJ143 (CJ029's sibling)  | Fibroblast culture | 40.8X               |
| CJ102                    | Brain              | 32.4X               |
| CJ103 (CJ102's sibling)  | Buccal swab        | 38.5X               |

752

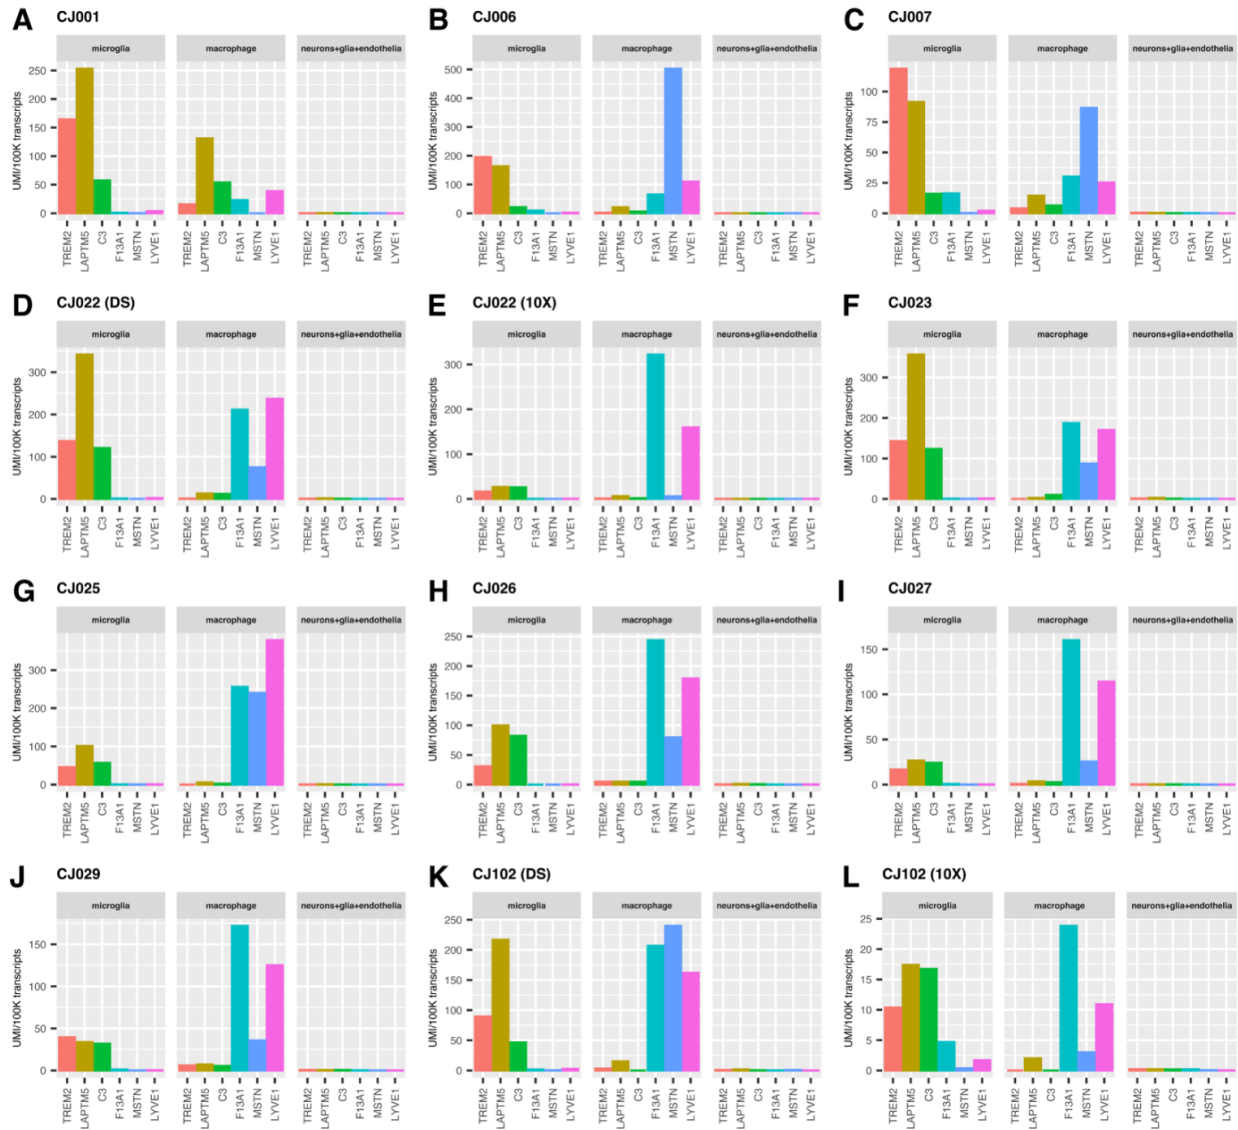

753  
754  
755  
756  
757  
758  
759  
760  
761  
762  
763  
764

**Supplementary Figure 1. Microglia and brain macrophages can be identified in all animals.** Expression of microglia and macrophage markers in microglia (left sub-panels), macrophages (middle sub-panels) and all other cell types in the brain (right sub-panels; neurons, glia (astrocytes, oligodendrocytes, polydendrocytes, ependymal cells), and endothelial cells) of each animal. Marmosets CJ022 and CJ102 were profiled using two technologies (DS: Drop-seq, 10X: 10X Chromium). y-axis: unique molecular identifier (UMI, a measure of transcript abundance) of each gene across cells, summed and normalized to 100,000 transcripts. Microglia markers: *TREM2*, *LAPT5*, *C3*; macrophage markers: *F13A1*, *MSTN*, *LYVE1*.

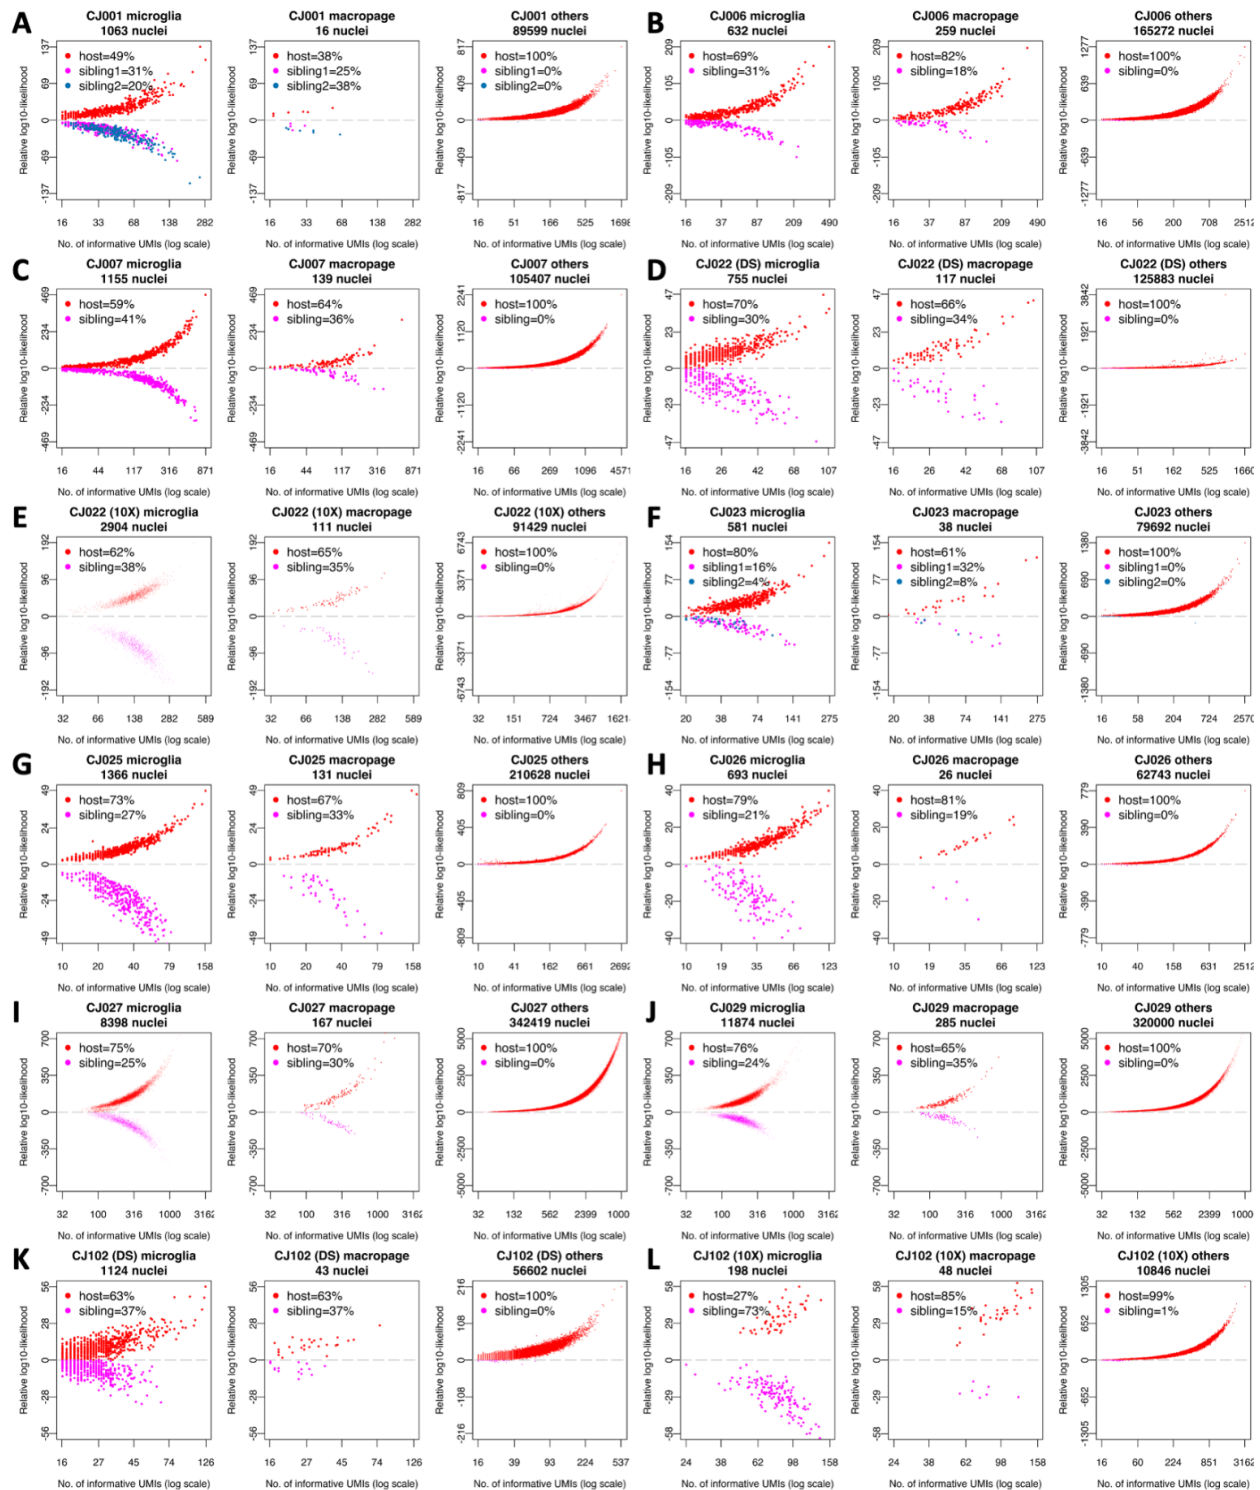

765  
 766 **Supplementary Figure 2. Donor-of-origin assignments from brain snRNA-seq reveals**  
 767 **only microglia and macrophages are chimeric. (A-L)** Donor of origin (Dropulation)  
 768 assignments of each nucleus from brain snRNA-seq of 10 animals. Marmosets CJ022 and  
 769 CJ102 were profiled using two technologies (DS: Drop-seq, 10X: 10X Chromium). For each  
 770 marmoset, the snRNA-seq data are grouped into microglia, macrophage, and all other cell types  
 771 (others: neurons, astrocytes, oligodendrocytes, polydendrocytes, ependymal cells, endothelial



772 cells). x-axis: number of UMI that contains SNPs for which the host and sibling's genomes differ,  
773 in log scale; y-axis: inferred likelihood that the cell has host genome minus likelihood that the  
774 cell has sibling genome (log10). Nuclei with positive y-values are assigned to the host and  
775 those on the negative y-axes are assigned to the sibling.  
776  
777

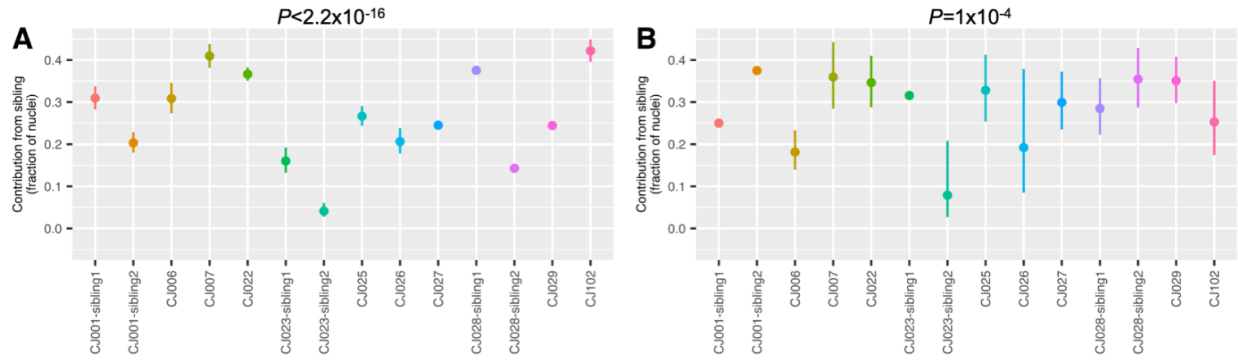

778  
779  
780  
781

**Supplementary Figure 3. Summary of microglia (A) and macrophage (B) chimerism across animals.** y-axis: fraction of twin cells. Vertical bars: binomial confidence interval (95%). P-values: test of heterogeneity across animals.

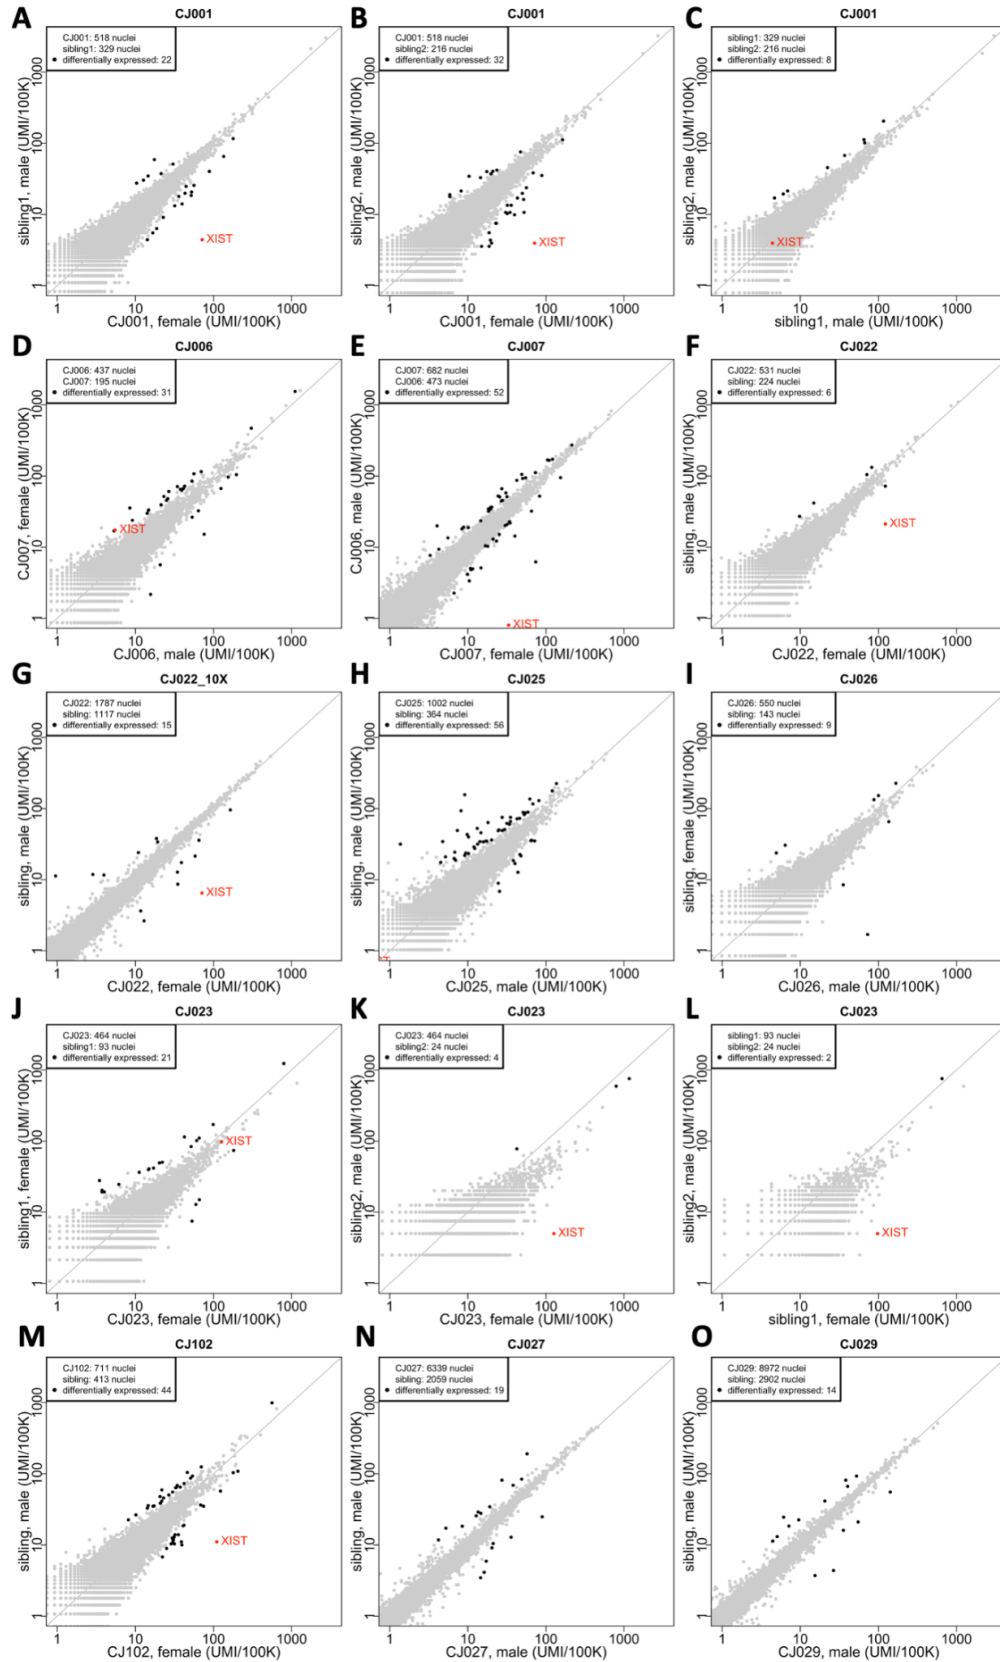

782  
783

**Supplementary Figure 4. Comparison of gene expression between microglia with**

784 **different genomes in each host animal's brain.** Each point represents a gene; its location on  
785 the plot represents the level of expression of that gene among microglia with two different  
786 genomes in the same animal. x- and y-axes: normalized gene expression levels (number of  
787 transcripts per 100,000 transcripts). Fold-change and *P*-values were calculated using edgeR  
788 and differentially expressed genes (black dots) were defined as: FDR  $Q$ -value $<0.05$  and fold-  
789 change $>1.5$  or less than  $1/1.5$  and the gene must be expressed in at least 10% of one of the  
790 microglia sets.

791

792

793

794

795

796

797

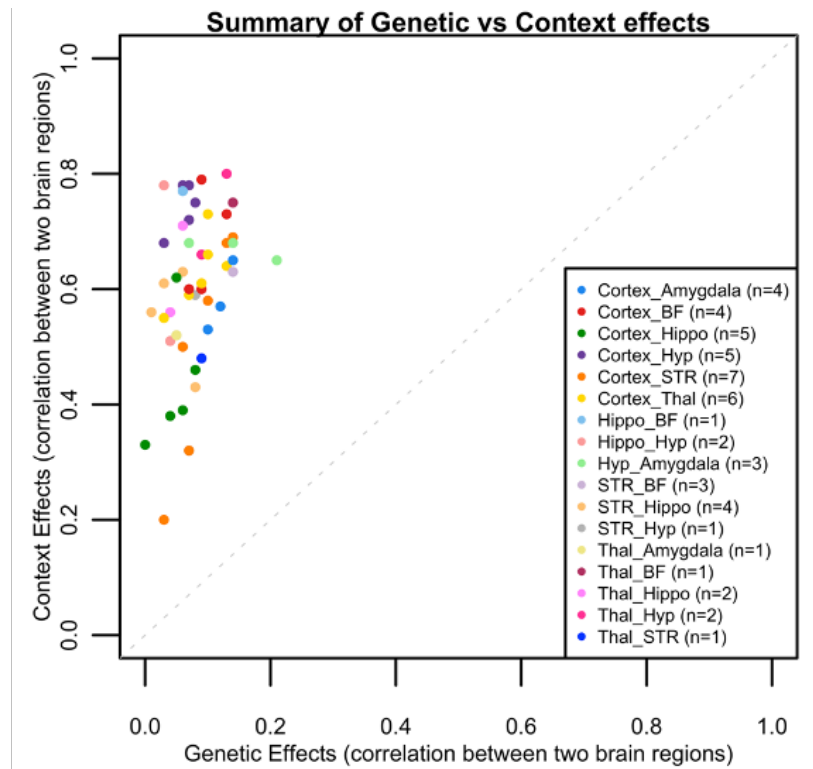

798

799

800

801

**Supplementary Figure 5. Summary of genetic versus context effects.** This is a plot of the correlation values from Supplementary Table 5. Abbreviations; STR: striatum; Thal: thalamus; Hippo: hippocampus; Hyp: hypothalamus; BF: basal forebrain

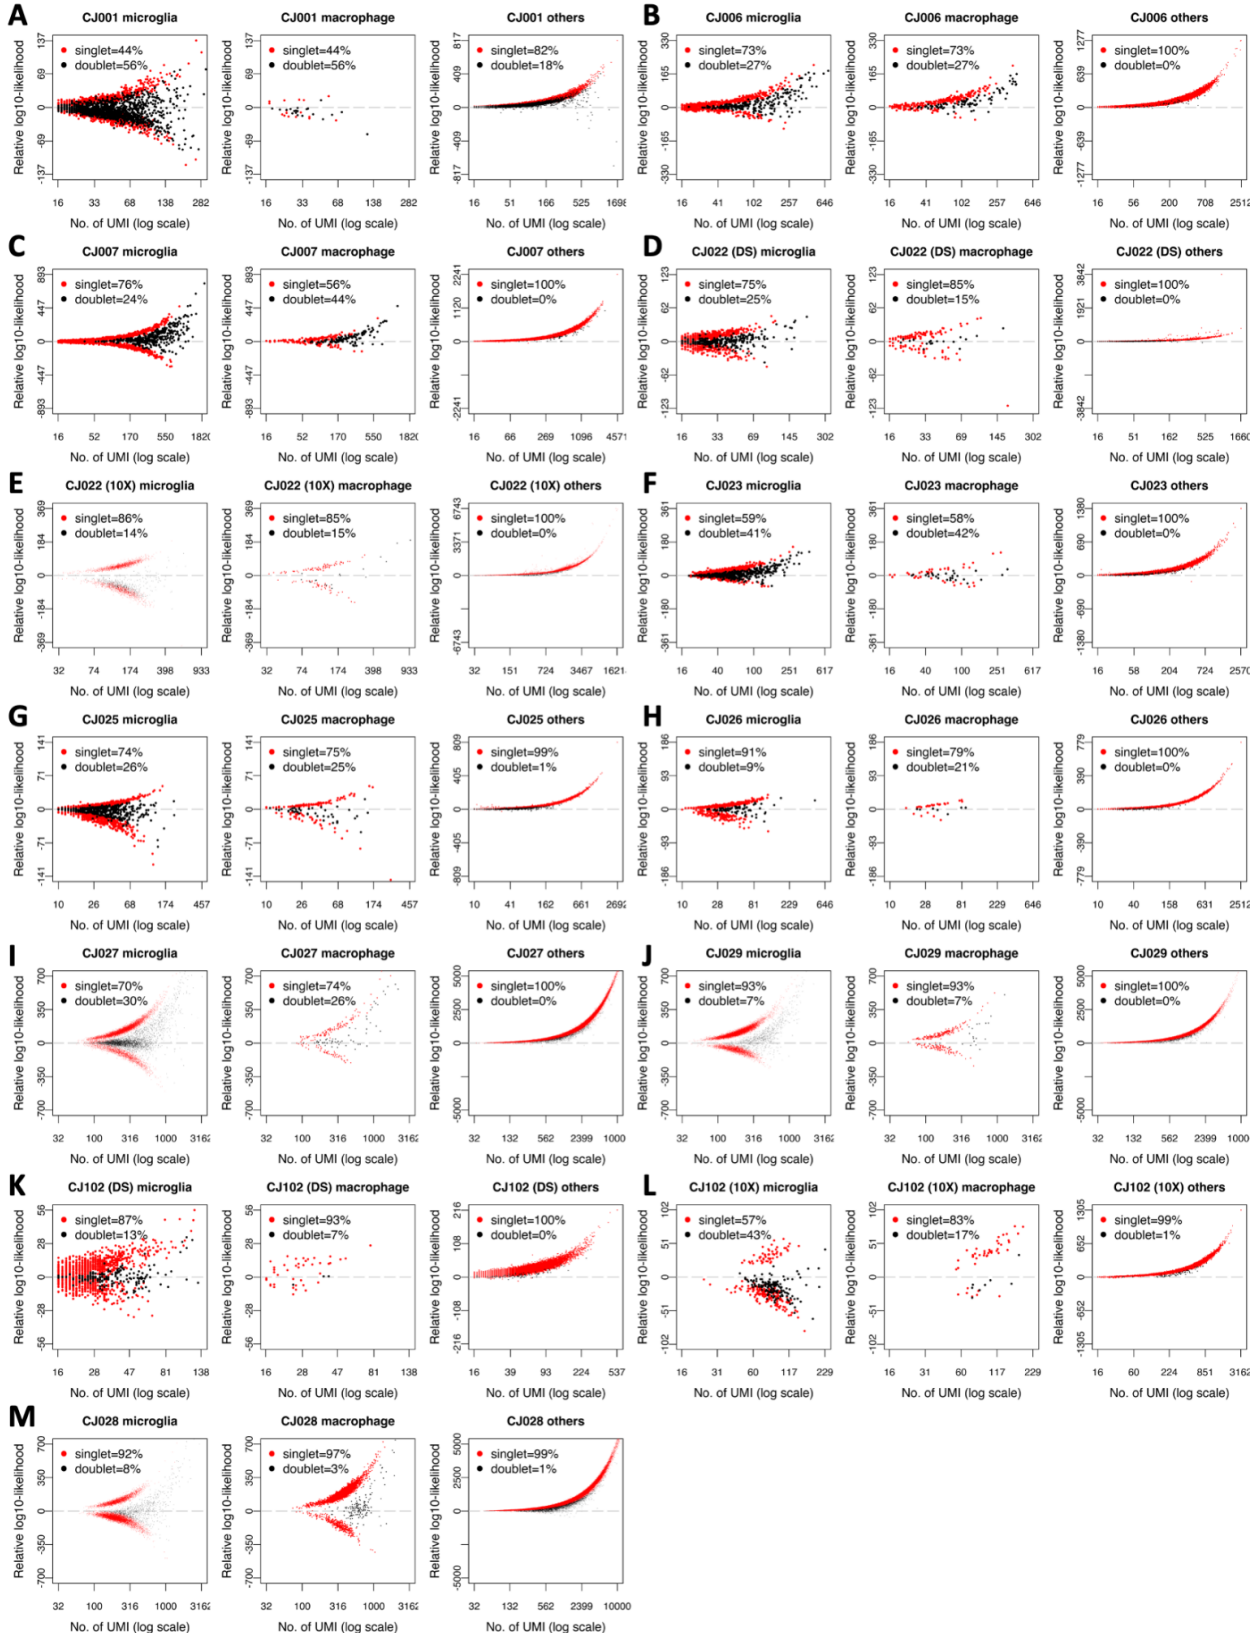

802  
803  
804

**Supplementary Figure 6. Doublet detection using host and sibling genotypes.** The axes are the same as in Supplementary Fig. 2, and each dot is a nucleus. Here, nuclei that were

805 identified as doublets and discarded in analyses were indicated (black dots). Marmosets CJ022  
806 and CJ102 were profiled using two technologies (DS: Drop-seq, 10X: 10X Chromium).  
807  
808  
809

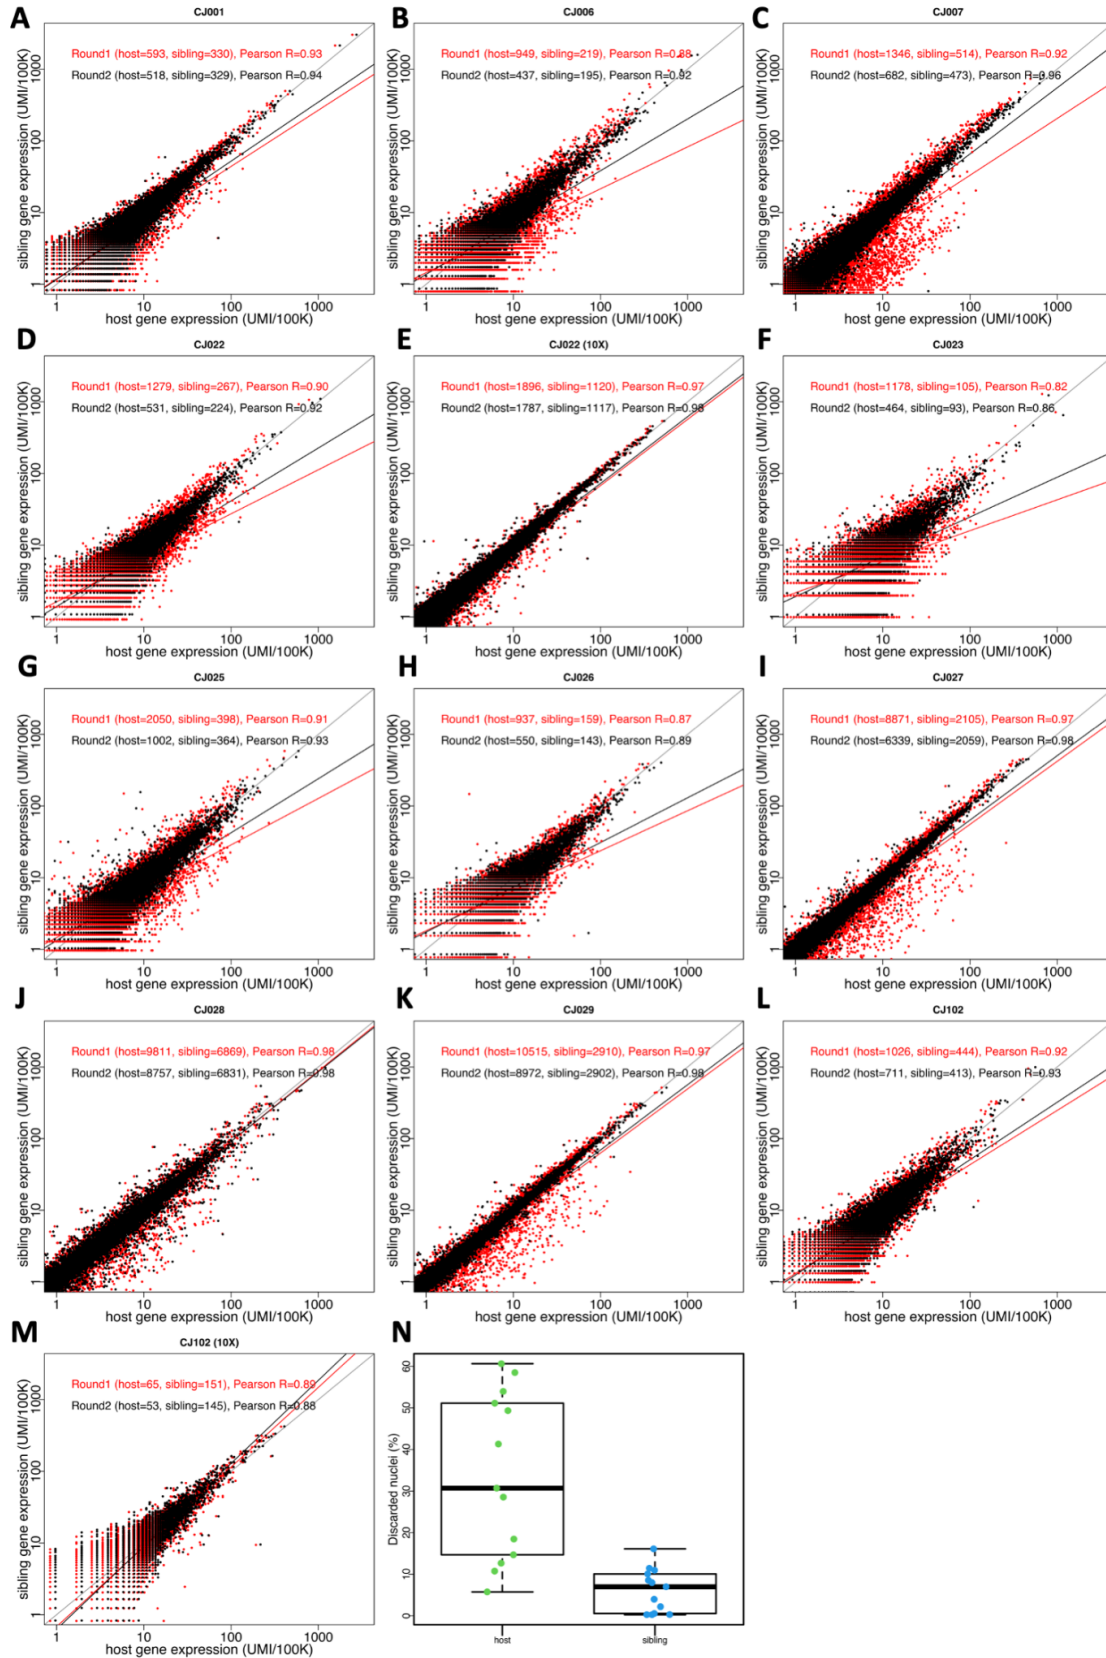

810  
811

Supplementary Figure 7. Second round clustering of microglia to discard mis-classified



812 **cells. (A-M)** Gene expression comparison between host and sibling cells. Red dots: nuclei  
813 identified as microglia from first-round of clustering, black dots: nuclei that were retained after  
814 second-round clustering. For triplets, only the first sibling is included in the plots. Pearson  
815 correlation as calculated for each set (before and after second round clustering) and shows an  
816 improvement in correlation after discarding mis-classified cells. Marmosets CJ022 and CJ102  
817 were profiled using two technologies (Drop-seq and 10X Chromium). **(N)** Summary (box plot) of  
818 fraction of microglia cells discarded during second round of clustering, for host and birth sibling.  
819  
820  
821  
822

823

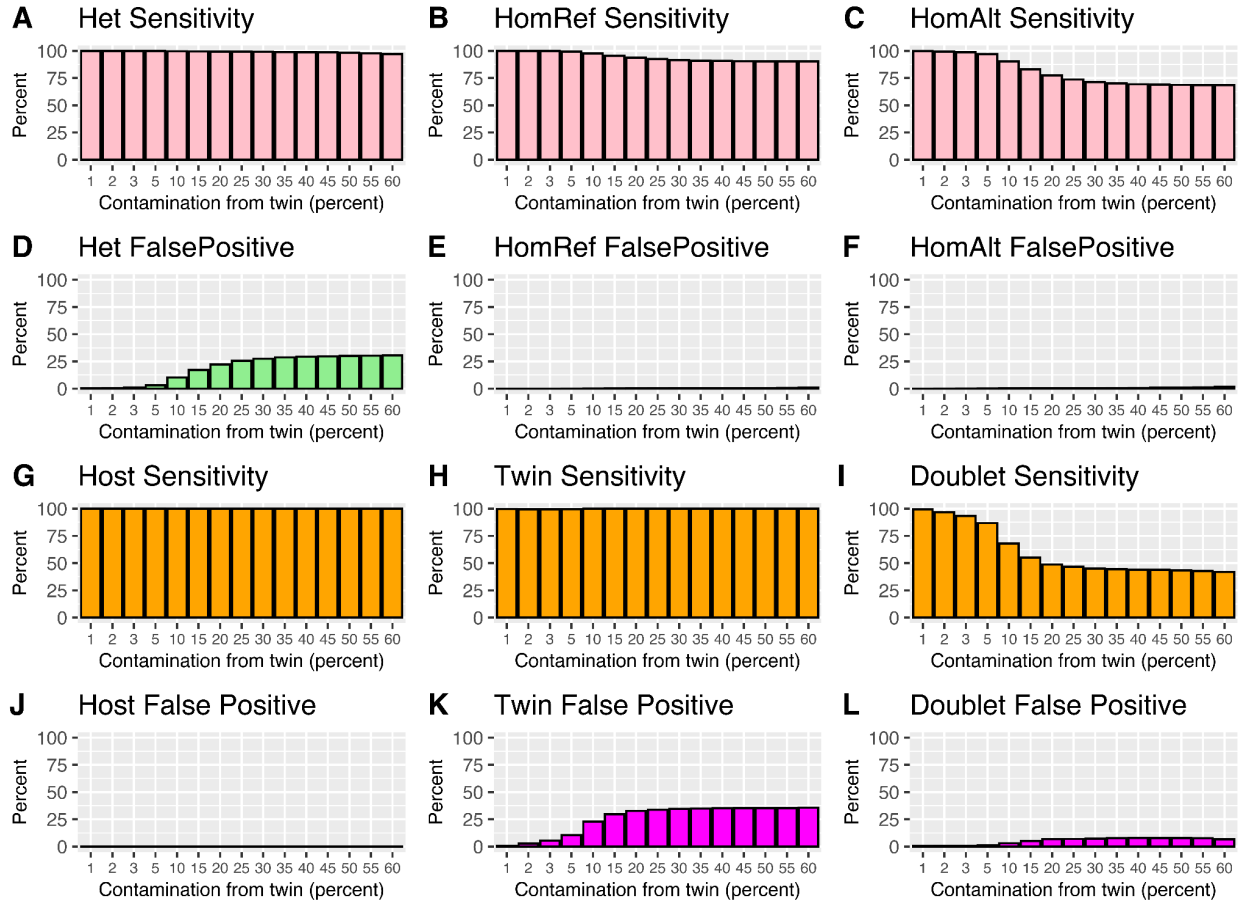

824

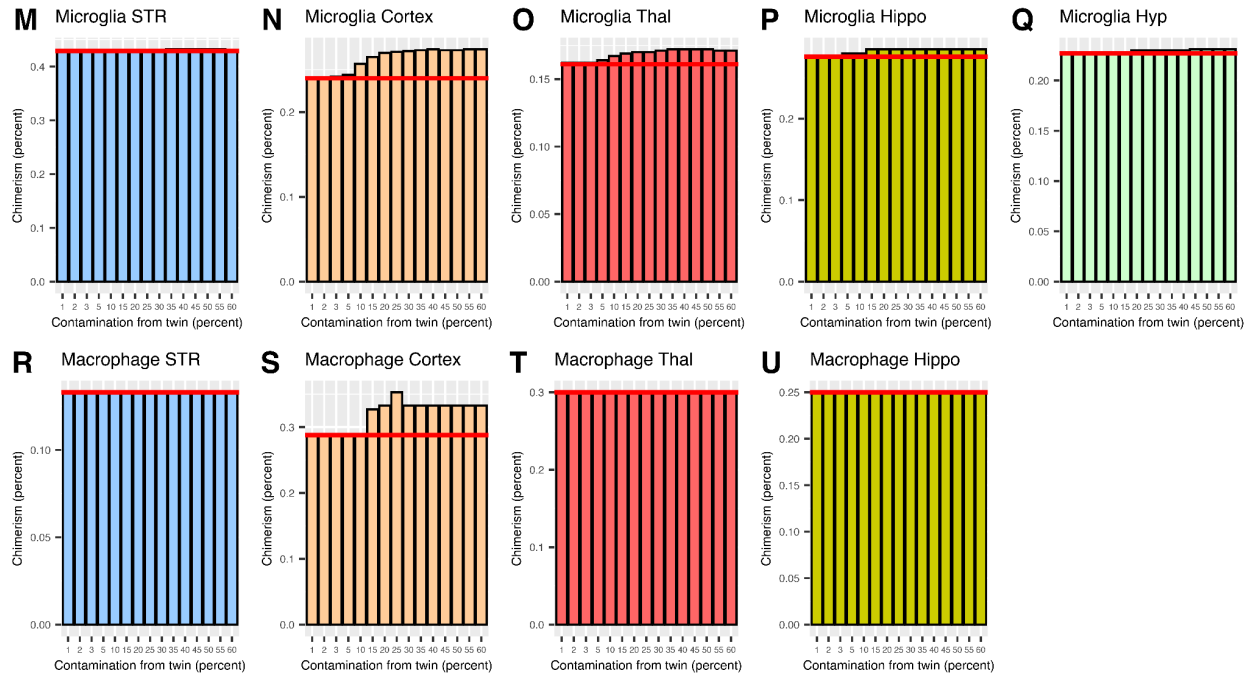

825

826

827

**Supplementary Figure 8. Analysis of genotyping and chimerism if the genotypes of the sibling are contaminated by the hosts' DNA. (A)-(F) Sensitivity and false positives in**

828 genotyping; HomRef: homozygous reference, HomAlt: homozygous alternate allele, Het:  
829 heterozygous. **(G)-(L)** Sensitivity and false positives in donor-of-origin assignment. **(M)-(Q)**  
830 Microglia chimerism estimates when sibling WGS are contaminated by the hosts' DNA, for 5  
831 brain regions; red horizontal line: chimerism estimates when there's no error in sibling  
832 genotypes. **(R)-(U)** Macrophage chimerism estimates when sibling WGS are contaminated by  
833 hosts' DNA; red horizontal line: chimerism estimates when there's no error in sibling genotypes.
